# Supplementary material for: Characterization and Genome Analysis of a Phthalate Esters-Degrading Strain Sphingobium yanoikuyae SHJ
Source: Biomed Res Int. 2018 Jul 3;2018:3917054. doi: 10.1155/2018/3917054 (PMC6051330; doi:10.1155/2018/3917054)
Supplement: Supplementary 1 — Table S1. Whole genome average nucleotide identity (ANI) analysis of Sphingobium yanoikuyae strain SHJ with other strains from genus Sphingobium. [file 3917054.f1.xlsx]

## Sheet: Sheet1
Query Strain	Target Strain	ANI
		ANIm aligned	ANI	Coverage
Sphingobium yanoikuyae SHJ	Sphingobium faniae	1170655	84.27	22.26
Sphingobium yanoikuyae SHJ	Sphingobium herbicidovorans MH	853899	84.33	16.23
Sphingobium yanoikuyae SHJ	Sphingobium baderi DE-13	1071749	84.35	20.37
Sphingobium yanoikuyae SHJ	Sphingobium japonicum BiD32	1481042	84.41	28.16
Sphingobium yanoikuyae SHJ	Sphingobium xenophagum NBRC 107872	1423060	84.5	27.05
Sphingobium yanoikuyae SHJ	Sphingobium chlorophenolicum L-1	1335828	84.7	25.4
Sphingobium yanoikuyae SHJ	Sphingobium xenophagum QYY	1423488	84.8	27.06
Sphingobium yanoikuyae SHJ	Sphingobium abikonense NBRC 16140	1337940	84.88	25.44
Sphingobium yanoikuyae SHJ	Sphingobium chlorophenolicum NBRC 16172	1286564	84.93	24.46
Sphingobium yanoikuyae SHJ	Sphingobium baderi LL03	1195795	84.97	22.73
Sphingobium yanoikuyae SHJ	Sphingobium chinhatense IP26	1578476	85.09	30.01
Sphingobium yanoikuyae SHJ	Sphingobium cloacae NBRC 102517	1302477	85.18	24.76
Sphingobium yanoikuyae SHJ	Sphingobium indicum B90A	1400448	85.19	26.62
Sphingobium yanoikuyae SHJ	Sphingobium amiense NBRC 102518	1339150	85.21	25.46
Sphingobium yanoikuyae SHJ	Sphingobium herbicidovorans NBRC 16415	946226	85.23	17.99
Sphingobium yanoikuyae SHJ	Sphingobium japonicum UT26S	1446768	85.28	27.5
Sphingobium yanoikuyae SHJ	Sphingobium barthaii KK22	1479654	85.3	28.13
Sphingobium yanoikuyae SHJ	Sphingobium lucknowense F2	1311087	85.37	24.92
Sphingobium yanoikuyae SHJ	Sphingobium ummariense RL-3	1565874	85.37	29.77
Sphingobium yanoikuyae SHJ	Sphingobium czechense LL01	1792425	85.38	34.08
Sphingobium yanoikuyae SHJ	Sphingobium chungbukense DJ77	1234004	85.45	23.46
Sphingobium yanoikuyae SHJ	Sphingobium quisquiliarum P25	1202523	85.47	22.86
Sphingobium yanoikuyae SHJ	Sphingobium phenoxybenzoativorans SC 3	757109	85.64	14.39
Sphingobium yanoikuyae SHJ	Sphingobium lactosutens DS20	1522294	85.9	28.94
Sphingobium yanoikuyae SHJ	Sphingobium yanoikuyae B1	3876370	96.26	73.69
Sphingobium yanoikuyae SHJ	Sphingobium yanoikuyae B2	4309033	96.32	81.92
Sphingobium yanoikuyae SHJ	Sphingobium yanoikuyae CD09 2	4048976	96.33	76.97
Sphingobium yanoikuyae SHJ	Sphingobium yanoikuyae TJ	3803272	96.37	75.03
Sphingobium yanoikuyae SHJ	Sphingobium yanoikuyae ATCC 51230	3990276	96.47	78.64
Sphingobium yanoikuyae SHJ	Sphingobium yanoikuyae XLDN2-5	4074699	96.5	77.46
