# Supplementary material for: Characterization and Genome Analysis of a Phthalate Esters-Degrading Strain Sphingobium yanoikuyae SHJ
Source: Biomed Res Int. 2018 Jul 3;2018:3917054. doi: 10.1155/2018/3917054 (PMC6051330; doi:10.1155/2018/3917054)
Supplement: Supplementary 3 — Table S3. Best hits of potential esterase and hydrolase proteins against nr database. [file 3917054.f3.xlsx]

## Sheet: Sheet1
Query_name	Query_description	Query_length	Query_start	Query_end	Hit_name	Hit_description	Hit_length	Hit_start	Hit_end	Aln_length	Identity	Coverage	E-value
BV87_04990	carboxylesterase	483	1	466	AIZ00845.1	carboxylesterase [Bacillus sp. K91]	489	1	479	486	38.2716	0.97955	2e-92
BV87_19970	carboxylesterase	522	29	510	AIZ00845.1	carboxylesterase [Bacillus sp. K91]	489	2	481	502	34.0637	0.981595	7e-85
BV87_23980	carboxylesterase	473	34	467	AIZ00845.1	carboxylesterase [Bacillus sp. K91]	489	4	475	489	32.5153	0.965235	2e-72
BV87_13955	carboxylesterase	481	1	459	AIZ00845.1	carboxylesterase [Bacillus sp. K91]	489	6	481	492	31.5041	0.973415	2e-64
BV87_04950	arylesterase	322	54	294	AGY55960.1	dialkyl PEs hydrolase [uncultured bacterium]	315	58	283	249	31.3253	0.71746	2e-24
BV87_08010	esterase	282	55	177	AIZ00845.1	carboxylesterase [Bacillus sp. K91]	489	85	216	138	29.7101	0.269939	3e-13
BV87_01330	esterase	285	44	143	AFK31309.1	dialkyl PE hydrolase [Acinetobacter sp. M673]	365	121	219	101	29.703	0.271233	2e-09
BV87_04545	alpha/beta hydrolase	361	135	354	AEW03609.1	Triacylglycerol lipase [Sulfobacillus acidophilus DSM 10332]	304	77	301	231	27.2727	0.740132	7e-11
BV87_20390	alpha/beta hydrolase	278	3	277	BAE78500.1	monoethylhexylphthalate hydrolase [Gordonia sp. P8219]	311	24	310	304	25.9868	0.92283	7e-07
BV87_25010	alpha/beta hydrolase	264	13	121	BAE78500.1	monoethylhexylphthalate hydrolase [Gordonia sp. P8219]	311	40	157	120	23.3333	0.379421	3e-07
BV87_20075	alpha/beta hydrolase	294	17	293	BAE78500.1	monoethylhexylphthalate hydrolase [Gordonia sp. P8219]	311	32	310	301	23.2558	0.897106	4e-08
BV87_01010	alpha/beta hydrolase	276	10	275	BAE78500.1	monoethylhexylphthalate hydrolase [Gordonia sp. P8219]	311	31	310	302	22.8477	0.900322	3e-10
BV87_17485	alpha/beta hydrolase	324	29	276	BAE78500.1	monoethylhexylphthalate hydrolase [Gordonia sp. P8219]	311	12	263	275	21.0909	0.810289	5e-07
